# Supplementary material for: Impact of molecular subtypes on metastatic behavior and overall survival in patients with metastatic breast cancer: A single-center study combined with a large cohort study based on the Surveillance, Epidemiology and End Results database
Source: PubMed Central journal article supplement — Oncol Lett. 2020 Aug 5;20(4):87. doi: 10.3892/ol.2020.11948 (PMC7436893; doi:10.3892/ol.2020.11948), 2020-08-05
Supplement: Supplementary_Data.pdf [file Supplementary_Data.pdf]

Table SI. Distribution of different combinations of distant metastasis among the molecular subtypes of patients with metastatic breast cancer of the present cohort (n=166).

| Metastatic site(s)            | HR+/HER2- (n=92) | HR+/HER2+ (n=26) | HR-/HER2+ (n=21) | HR-/HER2- (n=27) | P-value |
|-------------------------------|------------------|------------------|------------------|------------------|---------|
| 1 Site                        | 55               | 12               | 12               | 13               |         |
| Bone-only                     | 14 (25.5)        | 0 (0.0)          | 3 (25.0)         | 0 (0.0)          | 0.034   |
| Lung-only                     | 5 (9.1)          | 2 (16.7)         | 1 (8.3)          | 0 (0.0)          | 0.537   |
| Pleural-only                  | 1 (1.8)          | 0 (0.0)          | 0 (0.0)          | 1 (7.7)          | 0.645   |
| Liver-only                    | 3 (5.5)          | 4 (33.3)         | 3 (25.0)         | 3 (23.1)         | 0.011   |
| Brain-only                    | 1 (1.8)          | 0 (0.0)          | 0 (0.0)          | 0 (0.0)          | 1.000   |
| DLN-only                      | 12 (21.8)        | 1 (8.3)          | 5 (41.7)         | 7 (53.8)         | 0.029   |
| Other-only                    | 19 (34.5)        | 5 (41.7)         | 0 (0.0)          | 2 (15.4)         | 0.032   |
| 2 Sites                       | 20               | 8                | 4                | 10               |         |
| Bone + Lung                   | 3 (15.0)         | 1 (12.5)         | 1 (25.0)         | 1 (10.0)         | 0.848   |
| Bone + Pleural                | 2 (10.0)         | 1 (12.5)         | 0 (0.0)          | 0 (0.0)          | 0.695   |
| Bone + Liver                  | 1 (5.0)          | 1 (12.5)         | 0 (0.0)          | 0 (0.0)          | 0.547   |
| Bone + Brain                  | 0 (0.0)          | 2 (25.0)         | 0 (0.0)          | 0 (0.0)          | 0.039   |
| Bone + DLN                    | 0 (0.0)          | 0 (0.0)          | 0 (0.0)          | 1 (10.0)         | 0.524   |
| Lung + Pleural                | 3 (15.0)         | 0 (0.0)          | 0 (0.0)          | 0 (0.0)          | 0.563   |
| Lung + Liver                  | 1 (5.0)          | 0 (0.0)          | 0 (0.0)          | 0 (0.0)          | 1.000   |
| Lung + Brain                  | 1 (5.0)          | 0 (0.0)          | 0 (0.0)          | 1 (10.0)         | 1.000   |
| Liver + DLN                   | 2 (10.0)         | 0 (0.0)          | 0 (0.0)          | 0 (0.0)          | 0.768   |
| Other                         | 7 (35.0)         | 3 (37.5)         | 3 (75.0)         | 7 (70.0)         | 0.231   |
| 3 Sites                       | 10               | 5                | 2                | 0                |         |
| Bone + Liver + DLN            | 1 (10)           | 1 (20)           | 1 (50)           | 0 (0.0)          | 0.493   |
| Lung + Pleural + DLN          | 1 (10)           | 0 (0.0)          | 0 (0.0)          | 0 (0.0)          | 1.000   |
| Lung + Pleural + Liver        | 1 (10)           | 0 (0.0)          | 0 (0.0)          | 0 (0.0)          | 1.000   |
| Bone + Pleural + Liver        | 2 (20)           | 0 (0.0)          | 0 (0.0)          | 0 (0.0)          | 0.632   |
| Bone + Lung + DLN             | 1 (10)           | 0 (0.0)          | 0 (0.0)          | 0 (0.0)          | 1.000   |
| Bone + Liver + Brain          | 1 (10)           | 1 (20)           | 0 (0.0)          | 0 (0.0)          | 1.000   |
| Bone + Lung + Liver           | 0 (0.0)          | 1 (20)           | 0 (0.0)          | 0 (0.0)          | 0.412   |
| Other                         | 3 (30)           | 2 (40)           | 1 (50)           | 0 (0.0)          | 1.000   |
| ≥4 Sites                      | 7                | 1                | 3                | 4                |         |
| Bone + Lung + Pleural + DLN   | 1 (14.3)         | 0 (0.0)          | 0 (0.0)          | 0 (0.0)          | 1.000   |
| Bone + Brain + Liver + Lung   | 2 (28.5)         | 0 (0.0)          | 0 (0.0)          | 0 (0.0)          | 0.733   |
| Bone + Lung + Pleural + Liver | 3 (42.9)         | 0 (0.0)          | 2 (66.7)         | 1 (25.0)         | 0.874   |
| Bone + Lung + Liver + Other   | 0 (0.0)          | 0 (0.0)          | 1 (33.3)         | 0 (0.0)          | 0.267   |
| Bone + Lung + Liver + DLN     | 0 (0.0)          | 0 (0.0)          | 0 (0.0)          | 1 (25.0)         | 0.533   |
| Other                         | 1 (14.3)         | 1 (100.0)        | 0 (0.0)          | 2 (50.0)         | 0.174   |

Values are expressed as n (%). DLN, distant lymph node; HR, hormone receptor; HER2, human epidermal growth factor receptor 2.

Table SII. Distribution of different combinations of distant metastasis among the molecular subtypes of patients with metastatic breast cancer from the Surveillance, Epidemiology and End Results dataset (n=15,322).

| Metastatic site(s)    | HR+/HER2-<br>(n=9,222) | HR+/HER2+<br>(n=2,710) | HR-/HER2+<br>(n=1,406) | HR-/HER2-<br>(n=1,984) | P-value |
|-----------------------|------------------------|------------------------|------------------------|------------------------|---------|
| 1 Site                | 6042                   | 1546                   | 761                    | 1200                   |         |
| Bone-only             | 4,640 (76.8)           | 913 (59.1)             | 252 (33.1)             | 468 (39.0)             | <0.001  |
| Lung-only             | 734 (12.1)             | 255 (16.5)             | 206 (27.1)             | 418 (34.8)             | <0.001  |
| Liver-only            | 446 (7.4)              | 299 (19.3)             | 254 (33.4)             | 190 (15.8)             | <0.001  |
| Brain-only            | 77 (1.3)               | 28 (1.8)               | 30 (3.9)               | 70 (5.8)               | <0.001  |
| DLN-only              | 70 (1.2)               | 33 (2.1)               | 16 (2.1)               | 39 (3.3)               | <0.001  |
| Other-only            | 75 (1.2)               | 18 (1.2)               | 3 (0.4)                | 15 (1.3)               | 0.183   |
| 2 Sites               | 2289                   | 774                    | 399                    | 541                    |         |
| Bone+Lung             | 1,085 (47.4)           | 217 (28.0)             | 72 (18.0)              | 144 (26.6)             | <0.001  |
| Bone+Liver            | 698 (30.5)             | 344 (44.5)             | 177 (44.3)             | 158 (29.2)             | <0.001  |
| Bone+Brain            | 171 (7.5)              | 62 (8.0)               | 22 (5.5)               | 27 (5.0)               | 0.080   |
| Bone+DLN              | 63 (2.7)               | 23 (3.0)               | 13 (3.3)               | 13 (2.4)               | 0.856   |
| Lung+Liver            | 134 (5.9)              | 79 (10.2)              | 71 (17.8)              | 107 (19.8)             | <0.001  |
| Lung+Brain            | 27 (1.2)               | 8 (1.0)                | 15 (3.8)               | 46 (8.5)               | <0.001  |
| Lung+DLN              | 26 (1.1)               | 8 (1.0)                | 7 (1.7)                | 12 (2.2)               | 0.175   |
| Liver+Brain           | 13 (0.6)               | 8 (1.0)                | 10 (2.5)               | 7 (1.3)                | 0.004   |
| Liver+DLN             | 5 (0.2)                | 11 (1.4)               | 3 (0.8)                | 1 (0.2)                | <0.001  |
| Other                 | 67 (2.9)               | 14 (1.8)               | 9 (2.3)                | 26 (4.8)               | 0.019   |
| 3 Sites               | 722                    | 312                    | 183                    | 173                    |         |
| Bone+Brain+Liver      | 51 (7.1)               | 22 (7.1)               | 21 (11.5)              | 19 (11.0)              | 0.092   |
| Bone+Brain+Lung       | 88 (12.2)              | 34 (10.9)              | 17 (9.3)               | 28 (16.2)              | 0.227   |
| Bone+Brain+DLN        | 1 (0.1)                | 2 (0.6)                | 2 (1.1)                | 0 (0.0)                | 0.085   |
| Bone+Liver+Lung       | 437 (60.5)             | 184 (59.0)             | 96 (52.4)              | 94 (54.3)              | <0.001  |
| Bone+Liver+DLN        | 17 (2.3)               | 18 (5.8)               | 13 (7.1)               | 4 (2.3)                | 0.004   |
| Bone+Lung+DLN         | 49 (6.8)               | 14 (4.4)               | 10 (5.5)               | 8 (4.6)                | 0.471   |
| Lung+Liver+Brain      | 12 (1.7)               | 8 (2.6)                | 11 (6.0)               | 9 (5.2)                | 0.001   |
| Liver+Brain+DLN       | 2 (0.3)                | 0 (0.0)                | 0 (0.0)                | 0 (0.0)                | 1.000   |
| Liver+Lung+DLN        | 5 (0.7)                | 5 (1.6)                | 4 (2.2)                | 3 (1.8)                | 0.170   |
| Other                 | 60 (8.3)               | 25 (8.0)               | 9 (4.9)                | 8 (4.6)                | 0.215   |
| ≥4 Sites              | 169                    | 78                     | 63                     | 70                     |         |
| Bone+Brain+Liver+Lung | 71 (42.0)              | 37 (47.4)              | 39 (61.9)              | 36 (51.4)              | <0.001  |
| Bone+Brain+Liver+DLN  | 2 (1.2)                | 0 (0.0)                | 1 (1.6)                | 0 (0.0)                | 0.449   |
| Bone+Brain+Lung+DLN   | 4 (2.4)                | 1 (1.3)                | 1 (1.6)                | 1 (1.4)                | 0.865   |
| Bone+Liver+Lung+DLN   | 20 (11.8)              | 8 (10.3)               | 10 (15.8)              | 6 (8.6)                | 0.028   |
| Brain+Liver+Lung+DLN  | 1 (0.6)                | 1 (1.3)                | 1 (1.6)                | 0 (0.0)                | 0.267   |
| Other                 | 71 (42.0)              | 31 (39.7)              | 11 (17.5)              | 27 (38.6)              | 0.006   |

Values are expressed as n (%). DLN, distant lymph node; HR, hormone receptor; HER2, human epidermal growth factor receptor 2.
